---

# A pilot analysis of circulating cfRNA transcripts for the detection of lung cancer

Chamindi Seneviratne<sup>1,2</sup>, Amol C. Shetty<sup>2</sup>, Xinyan Geng<sup>3</sup>, Carrie McCracken<sup>2</sup>, Jessica Cornell<sup>1</sup>,  
Kristin Mullins<sup>3,4</sup>, Feng Jiang<sup>3</sup>, and Sanford Stass<sup>3,4,\*</sup>

<sup>1</sup>Department of Psychiatry, University of Maryland School of Medicine, Baltimore, MD; [csenevi@som.umaryland.edu](mailto:csenevi@som.umaryland.edu); [Jcornell@som.umaryland.edu](mailto:Jcornell@som.umaryland.edu)

<sup>2</sup>The Institute for Genome Sciences, University of Maryland School of Medicine, Baltimore, MD; [AShetty@som.umaryland.edu](mailto:AShetty@som.umaryland.edu); [csenevi@som.umaryland.edu](mailto:csenevi@som.umaryland.edu); [cmccracken@som.umaryland.edu](mailto:cmccracken@som.umaryland.edu)

<sup>3</sup>Department of Pathology, University of Maryland School of Medicine, Baltimore, MD; [kmullins@som.umaryland.edu](mailto:kmullins@som.umaryland.edu); [Fjiang@som.umaryland.edu](mailto:Fjiang@som.umaryland.edu); [SStass@som.umaryland.edu](mailto:SStass@som.umaryland.edu)

<sup>4</sup>Laboratories of Pathology, University of Maryland Medical Center, Baltimore, MD; [kmullins@som.umaryland.edu](mailto:kmullins@som.umaryland.edu); [SStass@som.umaryland.edu](mailto:SStass@som.umaryland.edu)

\* Correspondence: [SStass@som.umaryland.edu](mailto:SStass@som.umaryland.edu)

**Abstract:** Lung cancers are the leading cause of cancer-related deaths worldwide. Studies have shown that non-small cell lung cancer (NSCLC) which constitute majority of lung cancers, are significantly more responsive to early-stage interventions. However, the early stages are often asymptomatic, and current diagnostic methods are limited in their precision and safety. The cell-free RNAs (cfRNA) circulating in plasma (Liquid biopsies) offer non-invasive detection of spatial and temporal changes occurring in primary tumors since early stages. To address gaps in current cfRNA knowledge base, we conducted a pilot study for comprehensive analysis of transcriptome-wide changes in plasma cfRNA in NSCLC patients. Total cfRNA was extracted from archived plasma collected from NSCLC patients (N=12; cases), cancer-free former smokers (N=12; control\_smokers) and non-smoking healthy volunteers (N=12; control\_healthy). Plasma cfRNA expression levels in each sample were quantified by using a tagmentation-based library preparation and sequencing. The comparisons of cfRNA expression levels between cases and the two control groups revealed a total of 2537 differentially expressed cfRNA enriched in 123 pathways in NSCLC patients. Of these, 222 transcripts were previously reported in primary NSCLCs. Our study provides a framework for developing a blood-based assay for early detection of NSCLC and warrants further validation.

**Keywords:** NSCLC; cell-free RNA; Liquid biopsies; biomarkers; smokers

---

## 1. Introduction

Lung cancers are the leading cause of cancer-related deaths in both men and women in the U.S. and worldwide. Non-small cell lung cancer (NSCLC) constitutes approximately 84% of all lung cancer cases, and consists of two main histological subtypes: adenocarcinoma (AC) and squamous cell carcinoma (SCC) [1]. The main risk factor for developing NSCLC is smoking, which is preventable, yet highly prevalent with over a billion smokers around the world [2]. Moreover, smoking and other environmental pollutants interact with biological factors such as aging and genetic risk variants to increase disease burden [3-6]. Furthermore, the NSCLC risk has been shown to correlate positively with severity and duration of smoking, and negatively with time since smoking cessation [7, 8].

Because the lung cancers are often asymptomatic in early stages, most patients are diagnosed at advanced stages resulting in only about 15-20% of patients surviving 5 years after the diagnosis [6]. The early-stage NSCLC are more responsive to treatment [9], and therefore, crucial to reduce mortality. At present, the only recommended diagnostic method for NSCLC is detection of pulmonary nodules (PNs) with low dose computed tomography (LDCT) [10]. In fact, based on data from Cancer Intervention and Surveillance Modeling Network (CISNET), the US Preventive Services Task Force (USPSTF)

NOTE: This preprint reports new research that has not been certified by peer review and should not be used to guide clinical practice.

recommended annual screening of adults aged 50 to 80 years of age with a smoking history of 20 or 47  
more pack-years, who currently smoke or quit smoking within the past 15 years [11]. This 2021 USPSTF 48  
recommendation (A-50-80-20-15) was updated to expand the population eligible for LDCT screening 49  
over the previous 2013 USPSTF recommendation that required smoking history of 30 or more pack- 50  
years (A-50-80-30-15). The LDCT has high negative predictive values, moderate sensitivity and 51  
specificity, and low positive predictive values [12]. A recent meta-analysis corresponding to data from 52  
84,558 participants who had a smoking history 15 or more pack-years indicated a 17% relative reduction 53  
in mortality in the group screened with LDCT compared to the control group [12]. Despite these 54  
encouraging statistics, there are several important limitations to using LDCT for NSCLC diagnosis. For 55  
example, the high false-positive rates can lead to further testing of benign PNs with invasive diagnostic 56  
and therapeutic procedures such as serial CTs, biopsy and surgery that carry their own morbidity. The 57  
invasive procedures are reported to be performed in 44% of smokers with indeterminate PNs that have 58  
roughly 5% probability of malignancy, and 35% of surgical resections are ultimately determined to be 59  
benign diseases [13]. Another concern is the exposure to radiation with repeated LDCT. Statistical 60  
modelling has predicted 1 death for every 13.0 lung-cancer related deaths avoided by LDCT with 2021 61  
USPSTF recommendations, which was a 2% worsening compared to risk associated with 2013 USPSTF 62  
recommendations[11]. Considering these factors, it is clinically important to develop noninvasive 63  
biomarkers to distinguish malignant from benign PNs facilitating positive screening results on LDCT. 64

Recently, the concept of liquid biopsies has garnered excitement among the scientific community 65  
for its' potential to provide real-time information on spatial and temporal changes in tumor markers in 66  
an easily obtained peripheral blood sample [14]. Several types of biomarkers have been explored in 67  
liquid biopsies as potential diagnostics with mixed results. Circulating tumor DNAs (ctDNA) have over 68  
90% sensitivity and specificity for NSCLC diagnosis in patients with stage II–IV NSCLC, but around 69  
50% in patients with stage I NSCLC when shedding rates are low [15]. Analysis of mutations in ctDNA 70  
has also been reported to have lower sensitivity and specificity in early-stage NSCLC [16]. Therefore, 71  
analysis of ctDNA-mutations or quantities appear to be more suitable for therapeutic and disease 72  
monitoring in NSCLC patients, rather than the early detection. In contrast, tumors with low shedding 73  
rates add cell-free RNAs (cfRNA) to blood circulation presenting with the opportunity to identify the 74  
overexpressed, tumor-specific, and tumor-derived RNA signals in the blood [17]. Studies have also 75  
shown that cfRNA could complement ctDNA and thus improve early diagnosis [18]. The studies of 76  
cfRNA have mainly focused on either microRNAs (miRNA) or a small number of known cancer-related 77  
messenger RNAs (mRNA)[19-21]. Moreover, the published studies have used large amounts of plasma 78  
- up to 4-5ml, for cfRNA extraction for expression analyses limiting its potential clinical use. We have 79  
conducted a pilot study to explore the ability to detect cfRNA signatures of NSCLC, particularly of the 80  
genes that were previously reported to be differentially expressed in lung cancer primary tissue 81  
biopsies, compared to both cancer-free smokers and healthy non-smokers. 82

## 2. Materials and Methods 83

**Study design:** In this pilot study, we first compared the expression levels of plasma cfRNA obtained 84  
from SCC and AC patients (N=12; cases) and cancer-free former smokers (N=12; control\_smokers). As 85  
all patients in the case group were also heavy smokers, we included a second control group of non- 86  
smoking healthy individuals (N=12; control\_healthy) to exclude differentially expressed cfRNAs 87  
associated with smoking, rather than pathological processes underlying NSCLC. Each participant 88  
provided whole blood samples as part of an umbrella protocol approved by the Institutional Review 89  
Board of the University of Maryland Baltimore [UMB IRB protocol ID: HP-00040666] and the Veterans 90  
Affairs Maryland Health Care System. All participants provided written informed consent to 91  
participate in research conducted at the University of Maryland Medical Center and the Baltimore VA 92  
Medical Center. Diagnosis of lung cancer was established by pathologic examination of tissues obtained 93  
via surgery or biopsy. Histological diagnosis was made on bronchoscopic biopsy specimens and 94  
thoracotomy according to the World Health Organization (WHO) categories. The NSCLC stage 95  
classification was based on WHO classification and the International Association for the Study of Lung 96  
Cancer staging system. The smokers consisted of former smokers who had a minimum smoking history 97



---

Hochberg correction method [26]. Significant differentially expressed cfRNA between conditions were determined using a false discovery rate (FDR) of 5% and a minimum absolute log<sub>2</sub>(fold-change) of 1.

### 3. Results

**cfRNA processing and quality control:** cfRNA was extracted from all 36 samples at mean concentrations of 0.111 ng/ul in cases, 0.085 ng/ul in control\_smokers, and 0.151ng/ul in control\_healthy group. The RNA integrity numbers (RIN) ranged from 1 to 5.3. All samples had sequence reads that mapped >80% to the reference sequence and mapped to exonic regions. Total Gene Abundance ranged from approximately 10 to 70 million. Of these genes, 0.5-10% were Hb coding genes, 0.5-20% mitochondrial genes, <0.03% ribosomal RNA (rRNA) genes, and up to 4% were other non-coding RNA (ncRNA) genes. Amongst protein coding genes, the most abundant were actin, myosin, platelet-specific genes, and pseudogenes.

**Identification of differentially expressed cfRNA:** Differential expression of cfRNA was analyzed after excluding Hb, Mitochondrial and rRNA transcripts. As shown in Figure 1.1, a total of 1,905 (X+Y+Z) cfRNA were identified to be differentially expressed in plasma samples from cases compared to the two control groups. Of these, 2 cfRNA (LINC01956 and TAS2R16) were differentially expressed in opposite directions in cases compared to control\_smokers and control\_healthy groups, and therefore we have included theses in both X and Z categories in Figure 1.1: Both cfRNA were downregulated compared to control\_smokers and upregulated compared to control\_healthy group. Another 1,377 (B+C+D in Figure 1.1) cfRNA that were detected in cases, were differentially expressed in the same direction in cancer-free smokers.

Next, we explored cfRNA within each subtype of cases - AC and SCC, compared to both control groups irrespective of their statistical significance in the combined case group. Figure 1.2 presents all cfRNA within each subtype category excluding DEGs shared with cancer-free smokers (i.e., comparisons between control\_smokers and control\_healthy groups). Of these, a total of 452 cfRNA (64.3% all DEGs in Figure 1.2) were not detected in the combined cases (X+Y+Z in Figure 1.1), but uniquely differentially expressed in either AC or SCC, or both but in differing directions. As depicted in Figure 1.3, nearly half of all 2537 total cfRNA (1905+452) were functional protein coding genes. All cfRNA included in Figure 1 are listed in Supplementary Table 1.

158

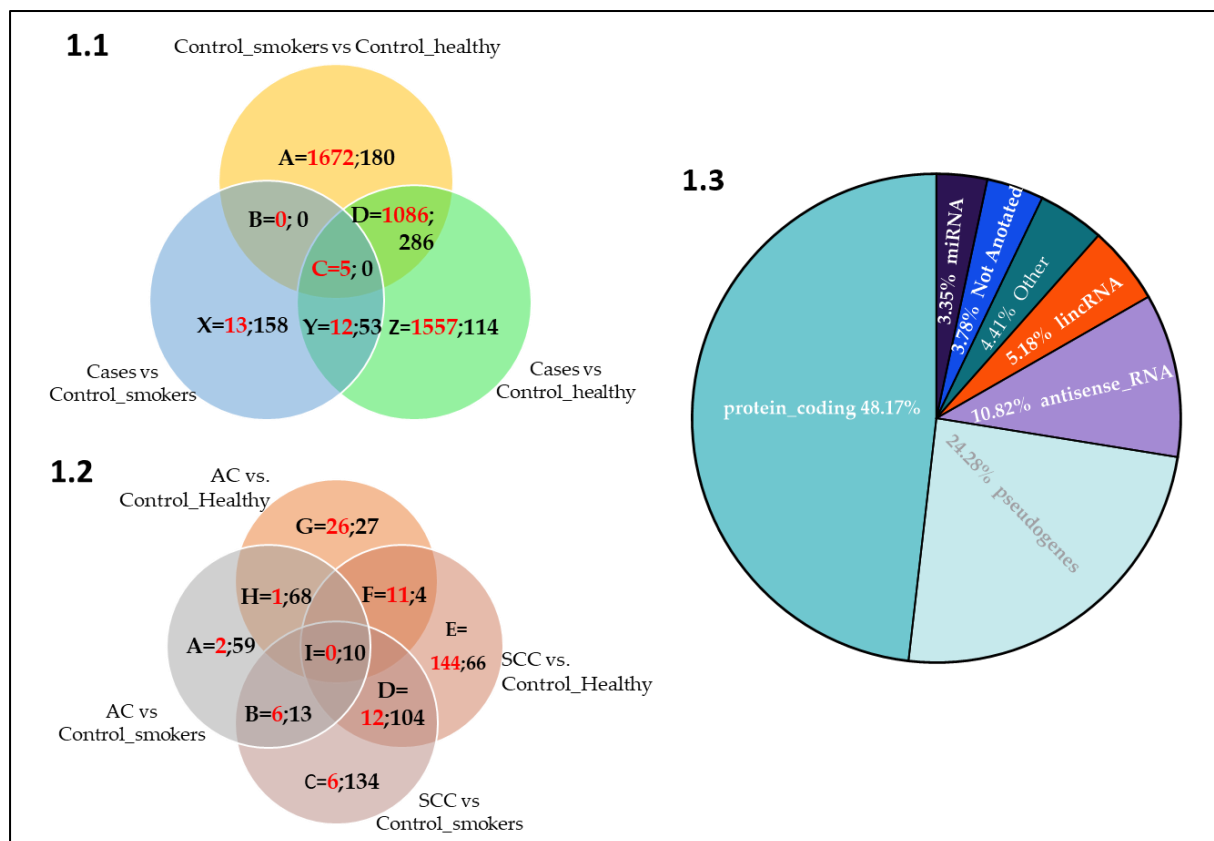

**Figure 1:** Distribution of NSCLC associated cfRNA. **1.1:** cfRNA in plasma samples from cases. **1.2:** cfRNA in subtypes AC and SCC. **1.3:** Distribution of NSCLC associated cfRNA within functional categories. The most common pseudogene subcategories were, processed\_pseudogenes (17.99%), unprocessed\_pseudogenes (2.89%), transcribed\_unprocessed\_pseudogenes (1.82%) and other subtypes were present <1%. The “Other” category included the following subcategories at less than 1% abundance: IG\_V\_genes, snoRNA, processed\_transcripts, TR\_V\_genes, TR\_J\_genes, sense\_intronic, misc\_RNA, scaRNA, sense\_overlapping, IG\_C\_genes, TR\_C\_genes, 3prime\_overlapping\_ncRNA, IG\_J\_genes, TEC, and TR\_D\_genes.

**Literature review to identify DEGs previously reported in primary NSCLC biopsies:** We performed an exhaustive review of all published studies listed on National Center for Biotechnology Information (NCBI)’s database for gene-specific information, using gene IDs for each of the 2537 identified DEGs. Studies reporting DEGs in primary NSCLC biopsies were identified and are referenced in *Supplementary Table 1*. Our literature review showed that 8.75% of total DEGs (N=222) have been reported in primary tumor biopsies from NSCLC patients in published studies. Majority of these replicated genes (N=159; 71.62%) were mRNA transcripts of protein coding genes, while some (N=37; 16.82%) were miRNA. Fifteen cfRNA that were differentially expressed in cases compared to both control groups (category “Y” in Figure 1.1) and reported in primary NSCLC tissue biopsies are listed in Table 2.

**Pathway enrichment analysis:** The cfRNA included in each category of Figure 1.1 were significantly enriched in 123 pathways across the three comparison groups. The cases compared to control\_smokers had 1 significantly enriched pathway that was also detected in cancer-free smokers; GO:0010629 with 286 cfRNA in control\_smokers vs control\_healthy group (adjusted p= 0.0041) and 24 cfRNA in cases vs control\_smokers group (adjusted p= 5.98E-05). However, at an individual gene level, only 2 cfRNA (MIR874 and MIR551B) in GO:0010629 were common to the 2 groups, both in terms of direction and

159  
160  
161  
162  
163  
164  
165  
166  
167  
168  
169  
170  
171  
172  
173  
174  
175  
176  
177  
178  
179  
180  
181  
182  
183  
184  
185  
186

---

type. The cases vs control\_smokers and cases vs control\_healthy comparisons did not share any significantly enriched pathways. Eighty-five pathways were commonly enriched in cases and cancer-free smokers when each group was compared with the control\_healthy. Details of pathways that were uniquely enriched in cases compared with both control groups are presented in Table 3 below. The gene IDs for cfRNA enriched within these pathways are listed in Supplementary Table 2.

187  
188  
189  
190  
191  
192  
193  
194  
195  
196  
197  
198  
199  
200  
201  
202  
203  
204  
205  
206  
207  
208  
209  
210  
211  
212  
213  
214  
215  
216



**Table 2: cfRNA differentially expressed in cases compared to both control groups and confirmed by published studies**

\*For studies on lung biopsies; padj: p-value adjusted for multiple corrections based on the number of total detected cfRNA transcripts.

| Gene.name       | Gene.ID     | Gene.type            | compared to control_healthy group |                       |                       | compared to control_smokers group |                       |                       | References for findings in lung biopsies* |
|-----------------|-------------|----------------------|-----------------------------------|-----------------------|-----------------------|-----------------------------------|-----------------------|-----------------------|-------------------------------------------|
|                 |             |                      | log2FoldChange                    | p-value               | p-adj                 | log2FoldChange                    | p-value               | p-adj                 |                                           |
| ENSG00000102970 | CCL17       | protein_coding       | 8.7116                            | 1.5x10 <sup>-04</sup> | 5.2x10 <sup>-03</sup> | 9.1579                            | 5.0x10 <sup>-05</sup> | 1.1x10 <sup>-02</sup> | [27-29]                                   |
| ENSG00000104880 | ARHGEF18    | protein_coding       | 7.2400                            | 4.6x10 <sup>-11</sup> | 1.4x10 <sup>-08</sup> | 4.2579                            | 4.7x10 <sup>-05</sup> | 1.1x10 <sup>-02</sup> | [30]                                      |
| ENSG00000123892 | RAB38       | protein_coding       | -5.6801                           | 1.0x10 <sup>-03</sup> | 1.9x10 <sup>-02</sup> | -6.8853                           | 4.6x10 <sup>-05</sup> | 1.0x10 <sup>-02</sup> | [31, 32]                                  |
| ENSG00000178104 | PDE4DIP     | protein_coding       | -5.3701                           | 1.9x10 <sup>-04</sup> | 6.3x10 <sup>-03</sup> | -5.2635                           | 1.9x10 <sup>-04</sup> | 3.0x10 <sup>-02</sup> | [33, 34]                                  |
| ENSG00000259571 | BLID        | protein_coding       | -6.4355                           | 3.0x10 <sup>-03</sup> | 3.7x10 <sup>-02</sup> | -10.4897                          | 7.4x10 <sup>-07</sup> | 3.1x10 <sup>-04</sup> | [35]                                      |
| ENSG00000271303 | SRXN1       | protein_coding       | -4.8705                           | 3.3x10 <sup>-03</sup> | 3.9x10 <sup>-02</sup> | -5.9253                           | 2.5x10 <sup>-04</sup> | 3.7x10 <sup>-02</sup> | [36, 37]                                  |
| ENSG00000207586 | MIR135A2    | miRNA                | -19.6805                          | 2.1x10 <sup>-12</sup> | 8.9x10 <sup>-10</sup> | -25.9452                          | 1.5x10 <sup>-21</sup> | 3.3x10 <sup>-18</sup> | [38, 39]                                  |
| ENSG00000207639 | MIR193B     | miRNA                | -19.8578                          | 4.3x10 <sup>-08</sup> | 6.2x10 <sup>-06</sup> | -23.3468                          | 4.0x10 <sup>-11</sup> | 2.1x10 <sup>-08</sup> | [40-42]                                   |
| ENSG00000207647 | MIR153-1    | miRNA                | -17.9600                          | 1.9x10 <sup>-07</sup> | 2.3x10 <sup>-05</sup> | -25.6172                          | 1.4x10 <sup>-14</sup> | 1.1x10 <sup>-11</sup> | [43-46]                                   |
| ENSG00000207763 | MIR617      | miRNA                | 22.1588                           | 8.9x10 <sup>-10</sup> | 1.8x10 <sup>-07</sup> | 26.8981                           | 2.8x10 <sup>-14</sup> | 2.0x10 <sup>-11</sup> | [47]                                      |
| ENSG00000207863 | MIR125B2    | miRNA                | 12.9574                           | 1.0x10 <sup>-05</sup> | 7.3x10 <sup>-04</sup> | -10.2390                          | 2.7x10 <sup>-04</sup> | 3.8x10 <sup>-02</sup> | [48-50]                                   |
| ENSG00000221552 | MIR1303     | miRNA                | 23.9859                           | 3.3x10 <sup>-11</sup> | 1.1x10 <sup>-08</sup> | 39.7024                           | 2.8x10 <sup>-29</sup> | 1.8x10 <sup>-25</sup> | [30, 34]                                  |
| ENSG00000200478 | SNORD115-41 | snoRNA               | -14.1259                          | 1.2x10 <sup>-05</sup> | 8.3x10 <sup>-04</sup> | -37.1348                          | 3.8x10 <sup>-33</sup> | 1.2x10 <sup>-28</sup> | [51]                                      |
| ENSG00000212304 | SNORD12     | snoRNA               | -22.5404                          | 4.4x10 <sup>-10</sup> | 1.0x10 <sup>-07</sup> | -22.3897                          | 2.4x10 <sup>-10</sup> | 1.2x10 <sup>-07</sup> | [51]                                      |
| ENSG00000255717 | SNHG1       | processed_transcript | -4.2180                           | 1.4x10 <sup>-03</sup> | 2.3x10 <sup>-02</sup> | -5.2295                           | 5.0x10 <sup>-05</sup> | 1.1x10 <sup>-02</sup> | [52-54]                                   |

\*For studies on lung biopsies; p-adj: p-value adjusted for multiple corrections based on the number of total detected cfRNA transcripts.

**Table 3: Enriched pathways in cases compared to the two control groups**

| ID         | Description                                                             | Comparison               | No. of genes | pvalue      | p.adjust |
|------------|-------------------------------------------------------------------------|--------------------------|--------------|-------------|----------|
| GO:0009888 | tissue development                                                      | cases vs control_healthy | 248          | 1.05241E-06 | 0.001336 |
| GO:0030545 | receptor regulator activity                                             | cases vs control_healthy | 85           | 2.14178E-06 | 0.002111 |
| GO:0048018 | receptor ligand activity                                                | cases vs control_healthy | 79           | 2.46434E-06 | 0.002111 |
| GO:0032501 | multicellular organismal process                                        | cases vs control_healthy | 802          | 2.15885E-06 | 0.002132 |
| GO:0007186 | G protein-coupled receptor signaling pathway                            | cases vs control_healthy | 179          | 5.20986E-06 | 0.002827 |
| GO:0051272 | positive regulation of cellular component movement                      | cases vs control_healthy | 84           | 7.89141E-06 | 0.003597 |
| GO:0045165 | cell fate commitment                                                    | cases vs control_healthy | 46           | 1.96208E-05 | 0.006707 |
| GO:0010454 | negative regulation of cell fate commitment                             | cases vs control_healthy | 7            | 2.66162E-05 | 0.007885 |
| GO:0005198 | structural molecule activity                                            | cases vs control_healthy | 105          | 2.09195E-05 | 0.009907 |
| GO:0019958 | C-X-C chemokine binding                                                 | cases vs control_healthy | 5            | 2.31328E-05 | 0.009907 |
| GO:0007200 | phospholipase C-activating G protein-coupled receptor signaling pathway | cases vs control_healthy | 22           | 4.56492E-05 | 0.011269 |
| GO:0043503 | skeletal muscle fiber adaptation                                        | cases vs control_healthy | 4            | 4.45314E-05 | 0.011269 |
| GO:2001046 | positive regulation of integrin-mediated signaling pathway              | cases vs control_healthy | 5            | 6.62839E-05 | 0.014261 |
| GO:0001501 | skeletal system development                                             | cases vs control_healthy | 71           | 8.55912E-05 | 0.016903 |
| GO:0042221 | response to chemical                                                    | cases vs control_healthy | 513          | 0.000100227 | 0.018405 |
| GO:0051493 | regulation of cytoskeleton organization                                 | cases vs control_healthy | 73           | 0.000122165 | 0.020485 |
| GO:0005125 | cytokine activity                                                       | cases vs control_healthy | 42           | 6.62701E-05 | 0.022704 |
| GO:0042246 | tissue regeneration                                                     | cases vs control_healthy | 17           | 0.00018113  | 0.027754 |
| GO:0007399 | nervous system development                                              | cases vs control_healthy | 258          | 0.000258285 | 0.037022 |
| GO:0042692 | muscle cell differentiation                                             | cases vs control_healthy | 55           | 0.000254991 | 0.037022 |
| GO:1904888 | cranial skeletal system development                                     | cases vs control_healthy | 15           | 0.000320946 | 0.044566 |
| GO:0009953 | dorsal/ventral pattern formation                                        | cases vs control_healthy | 19           | 0.000326903 | 0.044695 |
| GO:0043403 | skeletal muscle tissue regeneration                                     | cases vs control_healthy | 11           | 0.000334573 | 0.044909 |
| GO:0008154 | actin polymerization or depolymerization                                | cases vs control_healthy | 34           | 0.000360888 | 0.046481 |
| GO:1902903 | regulation of supramolecular fiber organization                         | cases vs control_healthy | 51           | 0.000375061 | 0.047617 |
| GO:0016442 | RISC complex                                                            | cases vs control_smokers | 22           | 7.54508E-17 | 6.64E-15 |
| GO:0031332 | RNAi effector complex                                                   | cases vs control_smokers | 22           | 7.54508E-17 | 6.64E-15 |
| GO:0016441 | posttranscriptional gene silencing                                      | cases vs control_smokers | 23           | 4.44826E-15 | 1.62E-12 |
| GO:0035194 | posttranscriptional gene silencing by RNA                               | cases vs control_smokers | 23           | 4.32051E-15 | 1.62E-12 |
| GO:0035195 | gene silencing by miRNA                                                 | cases vs control_smokers | 23           | 3.22041E-15 | 1.62E-12 |
| GO:0031047 | gene silencing by RNA                                                   | cases vs control_smokers | 23           | 1.20046E-14 | 3.28E-12 |
| GO:0016458 | gene silencing                                                          | cases vs control_smokers | 23           | 1.50659E-13 | 3.29E-11 |
| GO:0040029 | regulation of gene expression, epigenetic                               | cases vs control_smokers | 23           | 7.58031E-13 | 1.38E-10 |
| GO:0010608 | posttranscriptional regulation of gene expression                       | cases vs control_smokers | 23           | 3.00277E-10 | 4.69E-08 |
| GO:1990904 | ribonucleoprotein complex                                               | cases vs control_smokers | 23           | 1.97925E-08 | 1.16E-06 |
| GO:1903231 | mRNA binding involved in posttranscriptional gene silencing             | cases vs control_smokers | 9            | 2.52524E-08 | 5.3E-06  |
| GO:0003729 | mRNA binding                                                            | cases vs control_smokers | 9            | 1.00689E-05 | 0.001057 |

#### 4. Discussion

Various subtypes of circulating cfRNA have been tested for early-stage detection of NSCLC. Building upon these studies, we performed a comprehensive analysis of circulating plasma cfRNA using next generation sequencing technologies to expand the repertoire of non-invasively measurable NSCLC signatures. We identified 2537 cfRNA enriched in 123 pathways in those with a diagnosis of NSCLC compared to control groups consisting of cancer-free smokers and non-smokers. Nearly half of the detected cfRNA were transcripts of protein coding genes, and 222 of 2537 cfRNA (8.75%) conformed to previously reported differentially expressed genes in primary tumor biopsies from NSCLC patients. A majority (159 of 222) of these replicated transcripts were protein coding genes, while the rest were previously reported miRNA and other non-coding RNAs. In fact, two of the snoRNAs - SNORD115-41 and SNORD12, were previously reported in NSCLC tissue biopsies by our group [51].

Importantly, our pilot study used a workflow that can be easily adopted to develop a clinical assay for profiling cfRNA using plasma volumes smaller than that were reported elsewhere. The archived plasma samples were derived from whole blood collected in standard 3-6 ml EDTA collection tubes routinely used in clinical care. Processing of small amounts of plasma (approximately 1.5ml) yielded less than 5ng of total cfRNA, and library preparation with enrichment and sequencing was carried out for efficient identification of cfRNA. Our methodology produced 200 to 350 million of sequence reads per sample, with over 80% of reads mapping to exonic regions of the reference, comparable to what is reported in methods that required much higher volumes of plasma [55].



This study has several limitations. First, biological factors such as gender and age have been shown to play a major role in development and prognosis of lung cancers [56]. For example, women smokers have greater risk for developing lung cancer compared to men who smoke, presumably due to underlying genetic and other biological differences between men and women [57, 58]; the AC subtype predominates in women, whereas SCC are more common in men [59]; and individuals aged 65 and older are at greater risk of developing lung cancers[56]. The modest sample size in this pilot project limited our ability to explore moderating effects of these biological factors on our findings. This is particularly true of the subtype analyses that revealed 452 differentially expressed cfRNA between AC and SCC groups that consisted of small numbers of patients. It should also be noted that in our analysis, both groups of smokers - with and without cancer, were significantly older than the non-smoking control group, possibly altering the number of cfRNA that were found to be associated with NSCLC (see Figure 1.1). Second, we were not able to test the tissue specificity of the identified cfRNA because of the unavailability of lung tissue biopsies from the included participants for direct comparisons with plasma cfRNA. Nevertheless, we have utilized two control groups to adjust for confounding effects of smoking on cfRNA expression levels and applied conservative statistical thresholds of 5% FDR and a minimum of 2-fold change difference in expression level between conditions to reduce false positive findings. Furthermore, the fact that we were able to detect cfRNA of hundreds of previously reported RNA transcripts from primary NSCLC biopsies, is indeed promising.

In summary, we have presented transcriptome-wide cfRNA profiling using small volumes of plasma providing a framework for developing a non-invasive (blood-based) assay for potentially early detection, diagnosis, and monitoring of NSCLC. Further studies are required for evaluation of our methodology and its clinical application.

**Supplementary Materials:** The following supporting information can be downloaded at: [...],

Supplementary Table 1: Differentially expressed cfRNA

Supplementary Table 2: Genes included in enriched pathways

**Author Contributions:** Conceptualization, C.S., A.C.S., F.J., K.M. and S.F.; methodology, C.S., A.C.S., F.J., and S.F.; formal analysis, A.C.S. and C.M.; resources, X.X.; data curation, C.S., A.C.S., X.G., C.M. and J.C.; writing—original draft preparation, C.S.; writing—review and editing, A.C.S., F.J., K.M. and S.F.; supervision, C.S., A.C.S., F.J., and S.F.; funding acquisition, S.F.. All authors have read and agreed to the published version of the manuscript

**Funding:** This research was funded by NCI-U24CA11509-01 (SS), FDA-5U01FD005946-06(FJ), and NCI-UH2CA229132 (FJ).

**Institutional Review Board Statement:** The study was conducted in accordance with the Declaration of Helsinki and approved by the Institutional Review Board (or Ethics Committee) of the University of Maryland Baltimore [UMB IRB protocol ID: HP-00040666] and the Veterans Affairs Maryland Health Care System [protocol ID: VA-00040666].

**Informed Consent Statement:** Informed consent was obtained from all subjects involved in the study.

**Acknowledgments:** Authors would like to thank Dan Gheba and Tara Kesteloot for their expert advice with developing the assays, John Sivinski for his assistance with sample processing, and Dr. Lisa Sadzewicz and Sandra Ott for advice and assistance with two-step sequencing.

**Conflicts of Interest:** The authors declare no conflict of interest.

## References

1. *American Cancer Society. Facts & Figures 2022.* American Cancer Society. Atlanta, Ga. , 2022.
2. *WHO global report on trends in prevalence of tobacco use 2000-2025.* Fourth ed. 2021, Geneva: World Health Organization.

- 
3. Li, Y., et al., *Genome-wide interaction analysis identified low-frequency variants with sex disparity in lung cancer risk*. Hum Mol Genet, 2022. 298-299
  4. Besaratinia, A., A. Caceres, and S. Tommasi, *DNA Hydroxymethylation in Smoking-Associated Cancers*. Int J Mol Sci, 2022. **23**(5). 300-301
  5. Huang, Y., et al., *Air Pollution, Genetic Factors, and the Risk of Lung Cancer: A Prospective Study in the UK Biobank*. Am J Respir Crit Care Med, 2021. **204**(7): p. 817-825. 302-303
  6. Bade, B.C. and C.S. Dela Cruz, *Lung Cancer 2020: Epidemiology, Etiology, and Prevention*. Clin Chest Med, 2020. **41**(1): p. 1-24. 304-305
  7. Leduc, C., et al., *Comorbidities in the management of patients with lung cancer*. Eur Respir J, 2017. **49**(3). 306
  8. Campling, B.G., et al., *Spontaneous smoking cessation before lung cancer diagnosis*. J Thorac Oncol, 2011. **6**(3): p. 517-24. 307-308
  9. Siegel, R.L., et al., *Cancer Statistics, 2021*. CA Cancer J Clin, 2021. **71**(1): p. 7-33. 309
  10. Force., U.S.P.S.T., *Final Update Summary: Lung Cancer: Screening*. <https://www.uspreventiveservicestaskforce.org/Page/Document/UpdateSummaryFinal/lung-cancer-screening>, July 2015. 310-312
  11. Force, U.S.P.S.T., et al., *Screening for Lung Cancer: US Preventive Services Task Force Recommendation Statement*. JAMA, 2021. **325**(10): p. 962-970. 313-314
  12. Jonas, D.E., et al., *Screening for Lung Cancer With Low-Dose Computed Tomography: Updated Evidence Report and Systematic Review for the US Preventive Services Task Force*. JAMA, 2021. **325**(10): p. 971-987. 315-316
  13. Tanner, N.T., et al., *Management of Pulmonary Nodules by Community Pulmonologists: A Multicenter Observational Study*. Chest, 2015. **148**(6): p. 1405-1414. 317-318
  14. Pinzani, P., et al., *Updates on liquid biopsy: current trends and future perspectives for clinical application in solid tumors*. Clin Chem Lab Med, 2021. **59**(7): p. 1181-1200. 319-320
  15. Li, R.Y. and Z.Y. Liang, *Circulating tumor DNA in lung cancer: real-time monitoring of disease evolution and treatment response*. Chin Med J (Engl), 2020. **133**(20): p. 2476-2485. 321-322
  16. Gale, D., et al., *Residual ctDNA after treatment predicts early relapse in patients with early-stage non-small cell lung cancer*. Ann Oncol, 2022. **33**(5): p. 500-510. 323-324
  17. Larson, M.H., et al., *A comprehensive characterization of the cell-free transcriptome reveals tissue- and subtype-specific biomarkers for cancer detection*. Nat Commun, 2021. **12**(1): p. 2357. 325-326
  18. Sorber, L., et al., *Circulating Cell-Free DNA and RNA Analysis as Liquid Biopsy: Optimal Centrifugation Protocol*. Cancers (Basel), 2019. **11**(4). 327-328
  19. Muller, S., et al., *Circulating MicroRNAs as Potential Biomarkers for Lung Cancer*. Recent Results Cancer Res, 2020. **215**: p. 299-318. 329-330
  20. de Fraipont, F., et al., *Circular RNAs and RNA Splice Variants as Biomarkers for Prognosis and Therapeutic Response in the Liquid Biopsies of Lung Cancer Patients*. Front Genet, 2019. **10**: p. 390. 331-332
  21. Peng, W., et al., *Diagnostic and Prognostic Potential of Circulating Long Non-Coding RNAs in Non Small Cell Lung Cancer*. Cell Physiol Biochem, 2018. **49**(2): p. 816-827. 333-334
  22. <https://www.illumina.com/products/by-type/sequencing-kits/library-prep-kits/rna-prep-enrichment.html>. 335-336
  23. Shetty, A.C., et al., *CAVERN: Computational and visualization environment for RNA-seq analyses*. 69th Annual Meeting. Houston, Texas: American Society of Human Genetics., 2019. 337-338

- 
24. Kim, D., et al., *Graph-based genome alignment and genotyping with HISAT2 and HISAT-genotype*. Nat Biotechnol, 2019. **37**(8): p. 907-915. 339 340
  25. Anders, S., P.T. Pyl, and W. Huber, *HTSeq—a Python framework to work with high-throughput sequencing data*. Bioinformatics, 2015. **31**(2): p. 166-9. 341 342
  26. Benjamini, Y. and Y. Hochberg, *Controlling the False Discovery Rate: A Practical and Powerful Approach to Multiple Testing*. Journal of the Royal Statistical Society. Series B (Methodological), 1995. **57**(1): p. 289–300. 343 344
  27. Yamashita, S., et al., *Combination of p53AIP1 and survivin expression is a powerful prognostic marker in non-small cell lung cancer*. J Exp Clin Cancer Res, 2009. **28**: p. 22. 345 346
  28. Ye, T., et al., *Chemokine CCL17 Affects Local Immune Infiltration Characteristics and Early Prognosis Value of Lung Adenocarcinoma*. Front Cell Dev Biol, 2022. **10**: p. 816927. 347 348
  29. Yang, J., et al., *Circular RNA CHST15 Sponges miR-155-5p and miR-194-5p to Promote the Immune Escape of Lung Cancer Cells Mediated by PD-L1*. Front Oncol, 2021. **11**: p. 595609. 349 350
  30. Song, C., et al., *Expression of p114RhoGEF predicts lymph node metastasis and poor survival of squamous-cell lung carcinoma patients*. Tumour Biol, 2013. **34**(3): p. 1925-33. 351 352
  31. Hsieh, J.J., et al., *RAB38 is a potential prognostic factor for tumor recurrence in non-small cell lung cancer*. Oncol Lett, 2019. **18**(3): p. 2598-2604. 353 354
  32. Chang, J.W., et al., *Comparison of genomic signatures of non-small cell lung cancer recurrence between two microarray platforms*. Anticancer Res, 2012. **32**(4): p. 1259-65. 355 356
  33. Weng, T.Y., et al., *Differential Expression Pattern of THBS1 and THBS2 in Lung Cancer: Clinical Outcome and a Systematic-Analysis of Microarray Databases*. PLoS One, 2016. **11**(8): p. e0161007. 357 358
  34. Li, S., et al., *Sequencing study on familial lung squamous cancer*. Oncol Lett, 2015. **10**(4): p. 2634-2638. 359
  35. Wang, H., et al., *Overexpression of ELF3 facilitates cell growth and metastasis through PI3K/Akt and ERK signaling pathways in non-small cell lung cancer*. Int J Biochem Cell Biol, 2018. **94**: p. 98-106. 360 361
  36. Li, Z., et al., *miRNA-124 modulates lung carcinoma cell migration and invasion*. Int J Clin Pharmacol Ther, 2016. **54**(8): p. 603-12. 362 363
  37. Wei, Q., et al., *Sulfiredoxin-Peroxiredoxin IV axis promotes human lung cancer progression through modulation of specific phosphokinase signaling*. Proc Natl Acad Sci U S A, 2011. **108**(17): p. 7004-9. 364 365
  38. Zhang, Y., et al., *ARID1A is downregulated in non-small cell lung cancer and regulates cell proliferation and apoptosis*. Tumour Biol, 2014. **35**(6): p. 5701-7. 366 367
  39. Wang, N. and T. Zhang, *Downregulation of MicroRNA-135 Promotes Sensitivity of Non-Small Cell Lung Cancer to Gefitinib by Targeting TRIM16*. Oncol Res, 2018. **26**(7): p. 1005-1014. 368 369
  40. Hu, F., et al., *Lung adenocarcinoma resistance to therapy with EGFR tyrosine kinase inhibitors is related to increased expression of cancer stem cell markers SOX2, OCT4 and NANOG*. Oncol Rep, 2020. **43**(2): p. 727-735. 370 371
  41. Choi, K.H., et al., *Dual-strand tumor suppressor miR-193b-3p and -5p inhibit malignant phenotypes of lung cancer by suppressing their common targets*. Biosci Rep, 2019. **39**(7). 372 373
  42. She, K., et al., *miR-193b availability is antagonized by LncRNA-SNHG7 for FAIM2-induced tumour progression in non-small cell lung cancer*. Cell Prolif, 2018. **51**(1). 374 375
  43. Chen, W.J., et al., *MicroRNA-153 expression and prognosis in non-small cell lung cancer*. Int J Clin Exp Pathol, 2015. **8**(7): p. 8671-5. 376 377
  44. Yuan, Y., et al., *Suppression of AKT expression by miR-153 produced anti-tumor activity in lung cancer*. Int J Cancer, 2015. **136**(6): p. 1333-40. 378 379

- 
45. Zhang, W., et al., *Expressions of connexin 32 and 26 and their correlation to prognosis of non-small cell lung cancer*. *Ai Zheng*, 2009. **28**(2): p. 173-6. 380  
381
46. Shan, N., et al., *MiR-153 inhibits migration and invasion of human non-small-cell lung cancer by targeting ADAM19*. *Biochem Biophys Res Commun*, 2015. **456**(1): p. 385-91. 382  
383
47. Kim, H.K., et al., *miR-592 and miR-552 can distinguish between primary lung adenocarcinoma and colorectal cancer metastases in the lung*. *Anticancer Res*, 2014. **34**(5): p. 2297-302. 384  
385
48. Huang, S.P., et al., *Downregulation of miR-125b-5p and Its Prospective Molecular Mechanism in Lung Squamous Cell Carcinoma*. *Cancer Biother Radiopharm*, 2022. **37**(2): p. 125-140. 386  
387
49. Wang, J., et al., *Expression and clinical evidence of miR-494 and PTEN in non-small cell lung cancer*. *Tumour Biol*, 2015. **36**(9): p. 6965-72. 388  
389
50. Wang, M., et al., *High expression of kinesin light chain-2, a novel target of miR-125b, is associated with poor clinical outcome of elderly non-small-cell lung cancer patients*. *Br J Cancer*, 2015. **112**(5): p. 874-82. 390  
391
51. Gao, L., et al., *Genome-wide small nucleolar RNA expression analysis of lung cancer by next-generation deep sequencing*. *Int J Cancer*, 2015. **136**(6): p. E623-9. 392  
393
52. Zhou, Q., et al., *A novel lncRNA-miRNA-mRNA competing endogenous RNA regulatory network in lung adenocarcinoma and kidney renal papillary cell carcinoma*. *Thorac Cancer*, 2021. **12**(19): p. 2526-2536. 394  
395
53. Tan, J., et al., *Integrative Analysis of Three Novel Competing Endogenous RNA Biomarkers with a Prognostic Value in Lung Adenocarcinoma*. *Biomed Res Int*, 2020. **2020**: p. 2837906. 396  
397
54. Shi, S.L. and Z.H. Zhang, *Long non-coding RNA SNHG1 contributes to cisplatin resistance in non-small cell lung cancer by regulating miR-140-5p/Wnt/beta-catenin pathway*. *Neoplasma*, 2019. **66**(5): p. 756-765. 398  
399
55. Rasmussen, M., et al., *RNA profiles reveal signatures of future health and disease in pregnancy*. *Nature*, 2022. **601**(7893): p. 422-427. 400  
401
56. Leiro-Fernandez, V., et al., *Predicting delays in lung cancer diagnosis and staging*. *Thorac Cancer*, 2019. **10**(2): p. 296-303. 402  
403
57. Hellyer, J.A. and M.I. Patel, *Sex disparities in lung cancer incidence: validation of a long-observed trend*. *Transl Lung Cancer Res*, 2019. **8**(4): p. 543-545. 404  
405
58. Molina, A.J., et al., *Trends in Lung Cancer Incidence in a Healthcare Area*. *Arch Bronconeumol*, 2015. **51**(11): p. e53-5. 406  
407
59. Pesch, B., et al., *Cigarette smoking and lung cancer--relative risk estimates for the major histological types from a pooled analysis of case-control studies*. *Int J Cancer*, 2012. **131**(5): p. 1210-9. 408  
409  
410  
411
